# Supplementary material for: HANABA TARANU regulates the shoot apical meristem and leaf development in cucumber (Cucumis sativus L.)
Source: PubMed Central journal article supplement (PMC4765787; doi:10.1093/jxb/erv409), 2015-08-28
Supplement: supp_erv409_jexbot147306_file001.pdf [file supp_erv409_jexbot147306_file001.pdf]

**Supplementary information for following article**

***HANABA TARANU* regulates the shoot apical meristem and leaf  
development in cucumber (*Cucumis sativus* L.)**

Lian Ding<sup>1</sup>, Shuangshuang Yan<sup>1</sup>, Li Jiang<sup>1</sup>, Meiling Liu<sup>1</sup>, Juan Zhang<sup>1</sup>, Jianyu Zhao<sup>1</sup>,  
Wensheng Zhao<sup>1</sup>, Ying-yan Han<sup>2</sup>, Qian Wang<sup>1</sup>, and Xiaolan Zhang<sup>1</sup>.#

## Figure S1

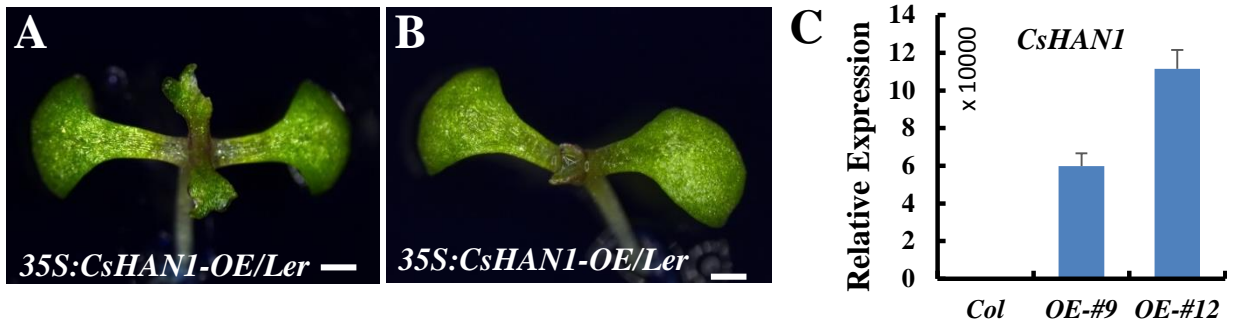

**Supplemental Figure S1. *CsHANI* overexpression in WT Arabidopsis.** (A-B) The lethal phenotype of the two *CsHANI* overexpression plants in *Ler* background. (C) qRT-PCR analyses of the *CsHANI* expression in *Col* background.

## Figure S2

A

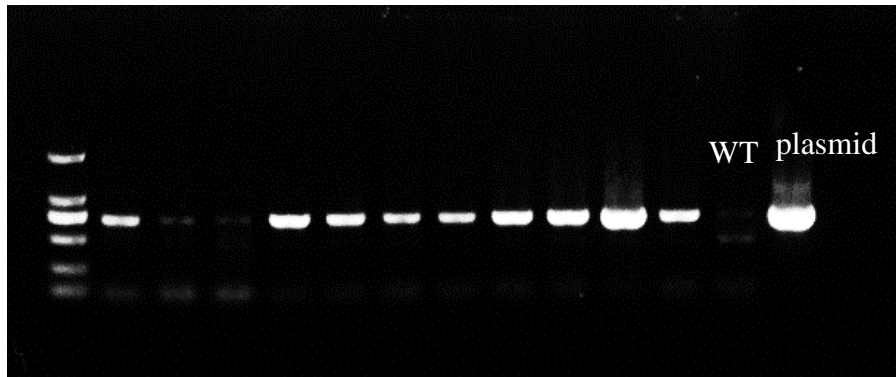

B

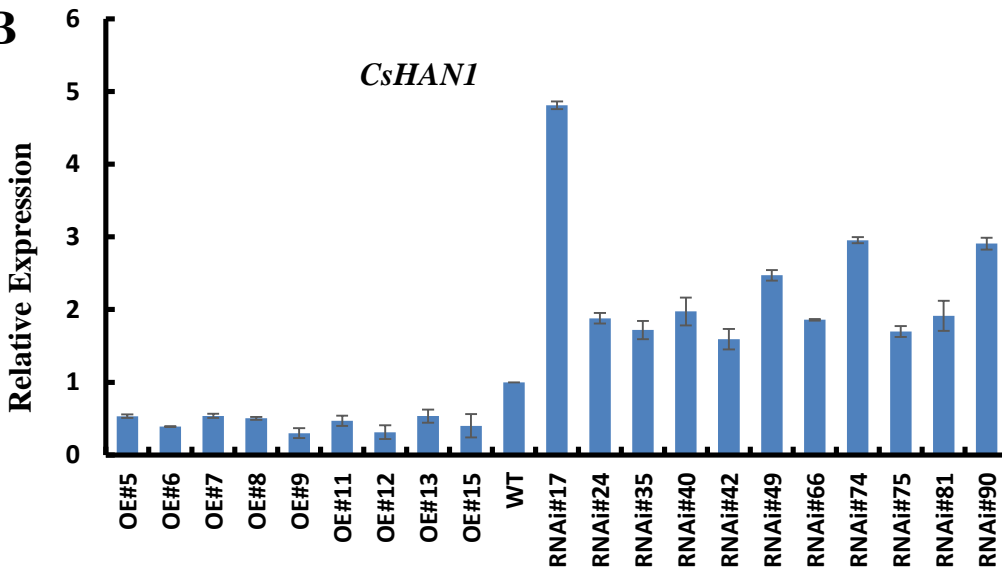

**Supplemental Figure S2. PCR identification and qRT-PCR analyses of transgenic cucumber.** (A) Representative gel picture of PCR identification of positive *35S:CsHANI-RNAi* transgenic plants. (B) qRT-PCR analyses of the nine *CsHANI*-OE and eleven *CsHANI*-RNAi transgenic plants.

**Figure S3**

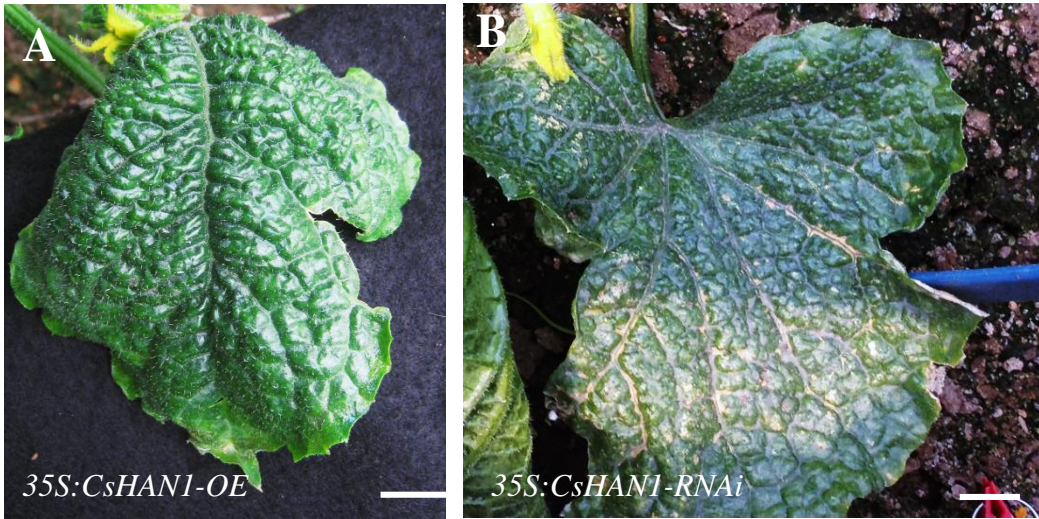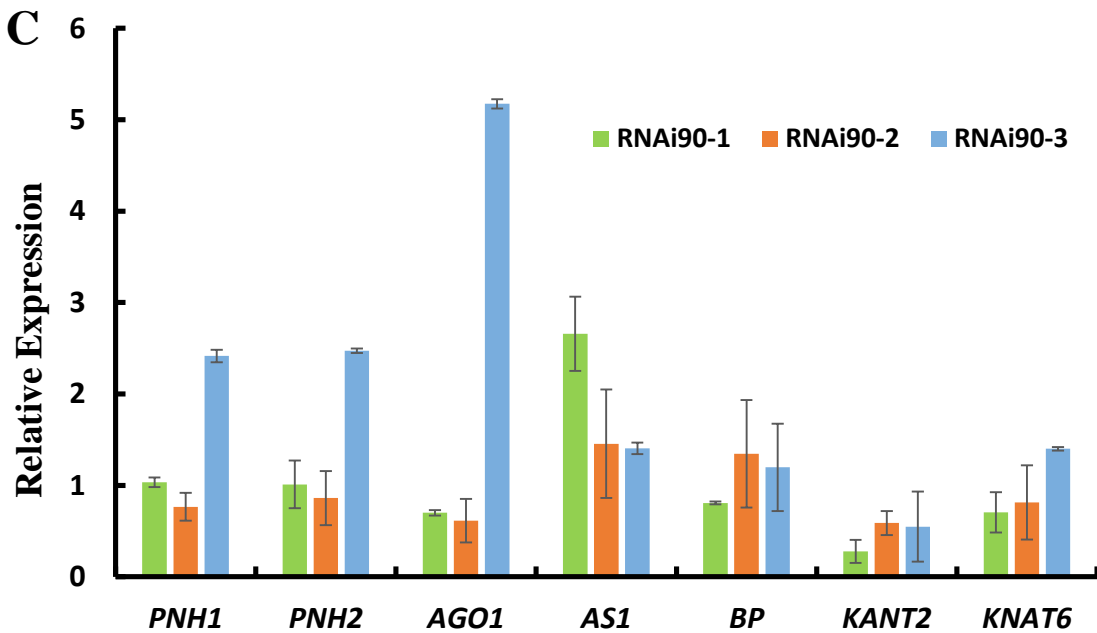

**Supplemental Figure S3. Leaf phenotype in the *CsHAN1* transgenic cucumber.** (A-B) The lobed leaves in the transgenic *CsHAN1*-OE line (A) and *CsHAN1*-RNAi line (B) showed in Figure 4B. (C) qRT-PCR analyses of leaf developmental genes in *CsHAN1*-RNAi line. The relative expression was calculated as the ratio of expression in lobed/normal leaves in the same plant.

## Figure S4

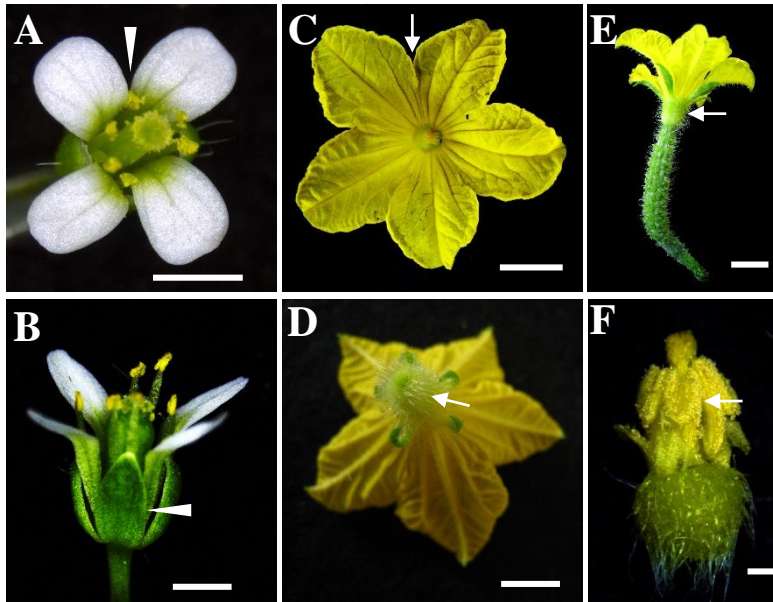

**Supplemental Figure S4. Flower morphology in *Arabidopsis* and cucumber.** (A-B) The top (A) and lateral (B) view of an *Arabidopsis* flower shows the separated floral organs. (C-D) The top (C) and dorsal view (D) of a cucumber male flower. (E) The side view of a cucumber female flower and (F) a male flower with the sepals and petals removed. Arrowheads show the separated floral organs in *Arabidopsis*, while the arrows indicate the fused floral organs in cucumber. Bars in (A-B) represent 1mm, in (C-F) represent 1cm.

**Supplemental Table S1. Primer information used in this study**

| <b>Primers for cloning</b> |                                  |
|----------------------------|----------------------------------|
| <i>HAN 1S</i>              | 5'-ATGATGCACCACTACGGCGG -3'      |
| <i>HAN 1A</i>              | 5'-TCATCTTGTGAAATCATGGACGAGA -3' |
| <i>HAN 2S</i>              | 5'-ATGATGCACCACTACGGCG -3'       |
| <i>HAN 2A</i>              | 5'-TCATCTTGTGAAATCATGGACGA -3'   |
| <b>Primers for qRT-PCR</b> |                                  |
| <i>qHAN1-S</i>             | 5'-GAACAGCTCGGTGGCAGAAT -3'      |
| <i>qHAN1-A</i>             | 5'-GTCCAACGTCTCTGTTTCCT -3'      |
| <i>qHAN2-S</i>             | 5'-GCTACAGCATCATTCTCATAG -3'     |
| <i>qHAN2-A</i>             | 5'-CAACTTGTGAAATCATAATAAAG -3'   |
| <i>UBI-ep-F</i>            | 5'-CACCAAGCCCAAGAAGATC-3'        |
| <i>UBI-ep-R</i>            | 5'-TAAACCTAATCACCACCAGC-3'       |
| <i>qCsPNH1-S</i>           | 5'-TAAAGCCAACCACTTCTAGC-3'       |
| <i>qCsPNH1-A</i>           | 5'-TTACTTCCTCCATCATAAACCG-3'     |
| <i>qCsPNH2-S</i>           | 5'-TCACCAAGGCAGGGGTAGA-3'        |
| <i>qCsPNH2-A</i>           | 5'-GATGGATGGGAGGAAGAAGCTC-3'     |
| <i>qCsAGO1-S</i>           | 5'-CCAGAAGGGCTACGACTGAAA-3'      |
| <i>qCsAGO1-A</i>           | 5'-GGGTCAAATTGAACCAAGAAA-3'      |
| <i>qCsJAG-S</i>            | 5'-TGATGAAGCAAAGGACAAGAAGA-3'    |
| <i>qCsJAG-A</i>            | 5'-CGGTGGGTACACGACAAGAGA-3'      |
| <i>qCsAS2-S</i>            | 5'-CTTCGTGACCCTGTCTACGG-3'       |
| <i>qCsAS2-A</i>            | 5'-CGTGGTTACCAATCCCTAAGTT-3'     |
| <i>qCsBP-S</i>             | 5'-AATGATGTAAATGAAAAGCTCAAATG-3' |
| <i>qCsBP-A</i>             | 5'-GTGAAGTAGTAGCTTCAGTCTTGAC-3'  |
| <i>qCsKNAT2-S</i>          | 5'-CAAACTATCTGTTACTACTGGTCTAG-3' |
| <i>qCsKNAT2-A</i>          | 5'-TCCAGTTTCTCCATTGTCATAAAA-3'   |
| <i>qCsKNAT6-S</i>          | 5'-CCCGACAATCTTATCCTTCCC-3'      |
| <i>qCsKNAT6-A</i>          | 5'-TGATGAGATCCGAACATAGGAATAG-3'  |
| <i>qJAG-S</i>              | 5'-ATCTCTCCAAGTCCTAACCTCCC -3'   |
| <i>qJAG-A</i>              | 5'-AGCGTCACCATCACGACCTTG -3'     |
| <i>qKNAT2-S</i>            | 5'-TCGGAGAAAGCGACGTTGAT-3'       |
| <i>aKNAT2-A</i>            | 5'-TCGAATACGCGGAAGCAACTC-3'      |
| <i>qSE-S</i>               | 5'-CGCTTTATGGGTCGCTATCAG-3'      |
| <i>qSE-A</i>               | 5'-AAAGGCACGTTTTTGTGTTGTGA-3'    |
| <i>qCBP20-S</i>            | 5'-GCTAAGAGCATCTACAACGGTT-3'     |
| <i>qCBP20-A</i>            | 5'-CAGGACGAAACAAAAGCCACA-3'      |
| <i>qAS2-S</i>              | 5'-GTCATCTCTCTCCTCCAACATCA-3'    |
| <i>qAS2-A</i>              | 5'-TGGCTGTTCCATCTGCTGCTC-3'      |
| <i>qSE-S</i>               | 5'-CGCTTTATGGGTCGCTATCAG-3'      |
| <i>qSE-A</i>               | 5'-AAAGGCACGTTTTTGTGTTGTGA-3'    |
| <i>qBP-F2</i>              | 5'-AATAGTAGCAATTATGGTCCTGG-3'    |

|                 |                                  |
|-----------------|----------------------------------|
| <i>qBP-R</i>    | 5'-CTTGAGTATTGTGGATGGCTCT-3'     |
| <i>qCUC3-F</i>  | 5'-GCTCAACGGTATCATCTTTCC-3'      |
| <i>qCUC3-R</i>  | 5'-AACCCAACAGACCATAACTCG-3'      |
| <i>qCsWUS-S</i> | <i>ATTCCACTTCTCCTATTACTACCTC</i> |
| <i>qCsWUS-A</i> | <i>GAACACTCTCTAAAAGTGTCTCAA</i>  |
| <i>qCsSTM-S</i> | <i>GGTAATAATGGTGGTGGGTGT</i>     |
| <i>qCsSTM-A</i> | <i>AGGGAGATGAGAGGAGGAAAT</i>     |
| <i>ACTIN2-F</i> | 5'-CCTTCGTCTTGATCTTGCGG-3'       |
| <i>ACTIN2-R</i> | 5'-AGCGATGGCTGGAACAGAAC -3'      |

---

**Primers for vector construction**

---

|                       |                                           |
|-----------------------|-------------------------------------------|
| <i>HAN2 OE-S</i>      | 5'-GCTCTAGAGCATGATGCAACGTTGTGGTAG-3'      |
| <i>HAN2 OE-A</i>      | 5'-TCCCCCGGGGATCAACTTGTGAAATCATAATAAAG-3' |
| <i>HAN1 OE-S</i>      | 5'-GCTCTAGAGCATGATGCACCACTACGGCG-3'       |
| <i>HAN1 OE-A</i>      | 5'-TCCCCCGGGGATCATCTTGTGAAATCATGGACGA-3'  |
| <i>HAN1-RNAi-AIS</i>  | 5'-AAGGGATCCCTTTGAACAGCTCGGTGGCAGAA-3'    |
| <i>HAN1-RNAi -A1A</i> | 5'-AAGGGTACCCTTAGTGGGCCGGTGATCGGTA-3'     |
| <i>HAN1-RNAi -SIS</i> | 5'-TCGAGCTCGATGAACAGCTCGGTGGCAGAA-3'      |
| <i>HAN1-RNAi -S1A</i> | 5'-GGACTAGTCCAGTGGGCCGGTGATCGGTA-3'       |

---

**Primers for *in situ* probes**

---

|                   |                                                          |
|-------------------|----------------------------------------------------------|
| <i>HAN1-sp6</i>   | 5'-GATTTAGGTGACACTATAGaatGCTGGGATTTCGATTCAAAAAGGAAGA-3'  |
| <i>HAN1-T7</i>    | 5'-tgTAATACGACTCACTATAGGGTTCATCTTGTGAAATCATGGACGAGA-3'   |
| <i>HAN2-sp6</i>   | 5'-GATTTAGGTGACACTATAGaatGCTGCTACAGCATCATTCTCATAG-3'     |
| <i>HAN2-T7</i>    | 5'-tgTAATACGACTCACTATAGGGCAACTTGTGAAATCATAATAAAG-3'      |
| <i>CsBP-SP6</i>   | 5'-GATTTAGGTGACACTATAGaatGCTTGGAGGAATATAATAATGATGTAAA-3' |
| <i>CsBP-T7-1</i>  | 5'-tgTAATACGACTCACTATAGGGTCTGACATTCCATGTAGGCTT-3'        |
| <i>Cs STM-SP6</i> | 5'-GATTTAGGTGACACTATAGaatGCTTCTTGTGTGAAGTAAAGGCTA-3'     |
| <i>Cs STM-T7</i>  | 5'-tgTAATACGACTCACTATAGGGGAGGAGATGAGAGGAGGA-3'           |
| <i>Cs WUS-SP6</i> | 5'-GATTTAGGTGACACTATAGaatGCTTTCTCCTATTACTACCTCCAATACT-3' |
| <i>Cs WUS-T7</i>  | 5'-tgTAATACGACTCACTATAGGGTGCAGAAACCACCGAGAT-3'           |

---
